# Supplementary material for: Geology and climate influence rhizobiome composition of the phenotypically diverse tropical tree Tabebuia heterophylla
Source: PLoS One. 2020 Apr 7;15(4):e0231083. doi: 10.1371/journal.pone.0231083 (PMC7138329; doi:10.1371/journal.pone.0231083)
Supplement: S1 Table — (XLSX) [file pone.0231083.s001.xlsx]

## Sheet: tukey test - interacción
Supplementary Table 1. Alpha diversity comparisons between rhizosphere and soil communities in each geologic and climatic site
COMPARISONS BETWEEN RHIZOSPHERE AND SOIL
diff lwr upr p adj
Rhizosphere-Bulk Soil 257.3179 82.56291 432.0728 0.0040182			*
COMPARISONS BETWEEN GEOLOGY TYPES
diff lwr upr p adj
Serpentine-Karst 1010.1932 754.0511 1266.3353 0			*
Volcanic-Karst -941.3893 -1197.5313 -685.2472 0			*
Volcanic-Serpentine -1951.5825 -2207.7245 -1695.4404 0			*
COMPARISONS BETWEEN ELEVATION
diff lwr upr p adj
Low-High 108.3421 -66.41289 283.097 0.2235368
COMPARISONS BETWEEN MICROHABITAT/SAMPLETYPE
diff lwr upr p adj
Rhizosphere-Bulk Soil 257.3179 82.56291 432.0728 0.0040182		*
COMPARISONS BETWEEN GEOLOGY/ELEVATION
diff lwr upr p adj
Serpentine:High-Karst:High 2133.66026 1692.6433 2574.6773 0.0000000					*
Volcanic:High-Karst:High -953.29828 -1394.3153 -512.2813 0.0000000					*
Karst:Low-Karst:High 849.38074 408.3637 1290.3977 0.0000010					*
Serpentine:Low-Karst:High 736.10690 295.0899 1177.1239 0.0000374					*
Volcanic:Low-Karst:High -80.09948 -521.1165 360.9175 0.9953524					ns
Volcanic:High-Serpentine:High -3086.95855 -3527.9756 -2645.9415 0.0000000					*
Karst:Low-Serpentine:High -1284.27952 -1725.2965 -843.2625 0.0000000					*
Serpentine:Low-Serpentine:High -1397.55337 -1838.5704 -956.5364 0.0000000					*
Volcanic:Low-Serpentine:High -2213.75974 -2654.7767 -1772.7427 0.0000000					*
Karst:Low-Volcanic:High 1802.67903 1361.6620 2243.6960 0.0000000					*
Serpentine:Low-Volcanic:High 1689.40518 1248.3882 2130.4222 0.0000000					*
Volcanic:Low-Volcanic:High 873.19880 432.1818 1314.2158 0.0000004					*
Serpentine:Low-Karst:Low -113.27385 -554.2909 327.7432 0.9773314					ns
Volcanic:Low-Karst:Low -929.48022 -1370.4972 -488.4632 0.0000001					*
Volcanic:Low-Serpentine:Low -816.20638 -1257.2234 -375.1894 0.0000030					*
COMPARISONS BETWEEN RHIZOSPHERE AND SOIL SAMPLES PER EACH ALTITUDE (Tukey test)
1	2	diff	lwr	upr	p adj
Karst:High:Rhizosphere	Karst:High:Bulk Soil	139.67	-576.486	855.825	0.999967	ns
Karst:High:Rhizosphere	Karst:Low:Bulk Soil	-547.981	-1264.14	168.174	0.332359	ns
Karst:High:Rhizosphere	Serpentine:High:Bulk Soil	-1916.04	-2632.19	-1199.88	0	*
Karst:High:Rhizosphere	Serpentine:Low:Bulk Soil	-814.185	-1530.34	-98.0291	0.011398	*
Karst:High:Rhizosphere	Volcanic:High:Bulk Soil	1683.92	967.764	2400.07	0	*
Karst:High:Rhizosphere	Volcanic:Low:Bulk Soil	-40.1724	-756.328	675.983	1	ns
Karst:Low:Bulk Soil	Karst:High:Bulk Soil	687.651	-28.5042	1403.81	0.0732406	ns
Karst:Low:Bulk Soil	Serpentine:High:Bulk Soil	-1368.06	-2084.21	-651.901	1e-07	*
Karst:Low:Bulk Soil	Volcanic:High:Bulk Soil	2231.9	1515.75	2948.06	0	*
Karst:Low:Rhizosphere	Karst:High:Bulk Soil	1150.78	434.625	1866.94	1.41e-05	*
Karst:Low:Rhizosphere	Karst:High:Rhizosphere	1011.11	294.955	1727.27	0.0002981	*
Karst:Low:Rhizosphere	Karst:Low:Bulk Soil	463.129	-253.027	1179.28	0.603054	ns
Karst:Low:Rhizosphere	Serpentine:High:Bulk Soil	-904.927	-1621.08	-188.772	0.0023574	*
Karst:Low:Rhizosphere	Serpentine:High:Rhizosphere	-1200.5	-1916.66	-484.347	4.4e-06	*
Karst:Low:Rhizosphere	Serpentine:Low:Bulk Soil	196.926	-519.23	913.081	0.999051	ns
Karst:Low:Rhizosphere	Volcanic:High:Bulk Soil	2695.03	1978.87	3411.19	0	*
Karst:Low:Rhizosphere	Volcanic:High:Rhizosphere	1373.46	657.302	2089.61	1e-07	*
Karst:Low:Rhizosphere	Volcanic:Low:Bulk Soil	970.938	254.782	1687.09	0.0006695	*
Serpentine:High:Bulk Soil	Karst:High:Bulk Soil	2055.71	1339.55	2771.86	0	*
Serpentine:High:Rhizosphere	Karst:High:Bulk Soil	2351.28	1635.13	3067.44	0	*
Serpentine:High:Rhizosphere	Karst:High:Rhizosphere	2211.61	1495.46	2927.77	0	*
Serpentine:High:Rhizosphere	Karst:Low:Bulk Soil	1663.63	947.476	2379.79	0	*
Serpentine:High:Rhizosphere	Serpentine:High:Bulk Soil	295.575	-420.58	1011.73	0.970409	ns
Serpentine:High:Rhizosphere	Serpentine:Low:Bulk Soil	1397.43	681.273	2113.58	0	*
Serpentine:High:Rhizosphere	Volcanic:High:Bulk Soil	3895.53	3179.38	4611.69	0	*
Serpentine:High:Rhizosphere	Volcanic:Low:Bulk Soil	2171.44	1455.29	2887.6	0	*
Serpentine:Low:Bulk Soil	Karst:High:Bulk Soil	953.855	237.699	1670.01	0.0009353	*
Serpentine:Low:Bulk Soil	Karst:Low:Bulk Soil	266.203	-449.952	982.359	0.986851	ns
Serpentine:Low:Bulk Soil	Serpentine:High:Bulk Soil	-1101.85	-1818.01	-385.698	4.28e-05	*
Serpentine:Low:Bulk Soil	Volcanic:High:Bulk Soil	2498.1	1781.95	3214.26	0	*
Serpentine:Low:Rhizosphere	Karst:High:Bulk Soil	658.029	-58.1264	1374.18	0.106231	ns
Serpentine:Low:Rhizosphere	Karst:High:Rhizosphere	518.359	-197.796	1234.51	0.421335	ns
Serpentine:Low:Rhizosphere	Karst:Low:Bulk Soil	-29.6222	-745.778	686.533	1	ns
Serpentine:Low:Rhizosphere	Karst:Low:Rhizosphere	-492.751	-1208.91	223.405	0.504378	ns
Serpentine:Low:Rhizosphere	Serpentine:High:Bulk Soil	-1397.68	-2113.83	-681.523	0	*
Serpentine:Low:Rhizosphere	Serpentine:High:Rhizosphere	-1693.25	-2409.41	-977.098	0	*
Serpentine:Low:Rhizosphere	Serpentine:Low:Bulk Soil	-295.825	-1011.98	420.33	0.970222	ns
Serpentine:Low:Rhizosphere	Volcanic:High:Bulk Soil	2202.28	1486.12	2918.43	0	*
Serpentine:Low:Rhizosphere	Volcanic:High:Rhizosphere	880.706	164.551	1596.86	0.0036559	*
Serpentine:Low:Rhizosphere	Volcanic:Low:Bulk Soil	478.187	-237.969	1194.34	0.55287	ns
Volcanic:High:Bulk Soil	Karst:High:Bulk Soil	-1544.25	-2260.4	-828.094	0	*
Volcanic:High:Bulk Soil	Serpentine:High:Bulk Soil	-3599.96	-4316.11	-2883.8	0	*
Volcanic:High:Rhizosphere	Karst:High:Bulk Soil	-222.677	-938.833	493.478	0.997102	ns
Volcanic:High:Rhizosphere	Karst:High:Rhizosphere	-362.347	-1078.5	353.808	0.882784	ns
Volcanic:High:Rhizosphere	Karst:Low:Bulk Soil	-910.329	-1626.48	-194.173	0.002134	*
Volcanic:High:Rhizosphere	Serpentine:High:Bulk Soil	-2278.38	-2994.54	-1562.23	0	*
Volcanic:High:Rhizosphere	Serpentine:High:Rhizosphere	-2573.96	-3290.12	-1857.8	0	*
Volcanic:High:Rhizosphere	Serpentine:Low:Bulk Soil	-1176.53	-1892.69	-460.376	7.8e-06	*
Volcanic:High:Rhizosphere	Volcanic:High:Bulk Soil	1321.57	605.417	2037.73	2e-07	*
Volcanic:High:Rhizosphere	Volcanic:Low:Bulk Soil	-402.52	-1118.68	313.636	0.789181	ns
Volcanic:Low:Bulk Soil	Karst:High:Bulk Soil	179.842	-536.313	895.998	0.999597	ns
Volcanic:Low:Bulk Soil	Karst:Low:Bulk Soil	-507.809	-1223.96	208.347	0.455043	ns
Volcanic:Low:Bulk Soil	Serpentine:High:Bulk Soil	-1875.87	-2592.02	-1159.71	0	*
Volcanic:Low:Bulk Soil	Serpentine:Low:Bulk Soil	-774.012	-1490.17	-57.8568	0.0215236	*
Volcanic:Low:Bulk Soil	Volcanic:High:Bulk Soil	1724.09	1007.94	2440.25	0	*
Volcanic:Low:Rhizosphere	Karst:High:Bulk Soil	-200.371	-916.527	515.784	0.998886	ns
Volcanic:Low:Rhizosphere	Karst:High:Rhizosphere	-340.041	-1056.2	376.114	0.92124	ns
Volcanic:Low:Rhizosphere	Karst:Low:Bulk Soil	-888.023	-1604.18	-171.867	0.0032064	*
Volcanic:Low:Rhizosphere	Karst:Low:Rhizosphere	-1351.15	-2067.31	-634.996	1e-07	*
Volcanic:Low:Rhizosphere	Serpentine:High:Bulk Soil	-2256.08	-2972.23	-1539.92	0	*
Volcanic:Low:Rhizosphere	Serpentine:High:Rhizosphere	-2551.65	-3267.81	-1835.5	0	*
Volcanic:Low:Rhizosphere	Serpentine:Low:Bulk Soil	-1154.23	-1870.38	-438.07	1.31e-05	*
Volcanic:Low:Rhizosphere	Serpentine:Low:Rhizosphere	-858.4	-1574.56	-142.245	0.0054137	*
Volcanic:Low:Rhizosphere	Volcanic:High:Bulk Soil	1343.88	627.723	2060.03	1e-07	*
Volcanic:Low:Rhizosphere	Volcanic:High:Rhizosphere	22.3059	-693.85	738.461	1	ns
Volcanic:Low:Rhizosphere	Volcanic:Low:Bulk Soil	-380.214	-1096.37	335.942	0.844893	ns
